# Supplementary material for: A critical evaluation for validation of composite and unidimensional postoperative pain scales in horses
Source: PubMed Central journal article supplement (PMC8341545; doi:10.1371/journal.pone.0255618), 2021-08-05
Supplement: pone.0255618.s001.pdf [file pone.0255618.s001.pdf]

**S1 Table. Demographic data including sex, breed, age, weight, procedure and peri-operative analgesia, and institution of each horse included in this validation study.**

| Horse | Sex      | Breed             | Age (years) | Weight (kg) | Procedure                              | Peri-operative analgesia | Institution                |
|-------|----------|-------------------|-------------|-------------|----------------------------------------|--------------------------|----------------------------|
| 1     | Gelding  | Thoroughbred      | 4           | 544         | Osteosynthesis                         | Phenylbutazone PO        | University of Pennsylvania |
| 2     | Stallion | Standardbred      | 3           | 500         | Osteosynthesis                         | Phenylbutazone PO        | University of Pennsylvania |
| 3     | Gelding  | Warmblood         | 16          | 581         | Desmotomy                              | Phenylbutazone PO        | University of Pennsylvania |
| 4     | Mare     | Standardbred      | 3           | 385         | Arthroscopy                            | Phenylbutazone PO        | University of Pennsylvania |
| 5     | Gelding  | Thoroughbred      | 2           | 477         | Arthroscopy & condylar fracture repair | Phenylbutazone PO        | University of Pennsylvania |
| 6     | Mare     | Thoroughbred      | 3           | 480         | Condylar fracture repair               | Phenylbutazone PO        | University of Pennsylvania |
| 7     | Gelding  | Thoroughbred      | 6           | 453         | LF fetlock arthrodesis                 | Phenylbutazone PO        | University of Pennsylvania |
| 8     | Mare     | Thoroughbred      | 4           | 540         | LF fetlock arthroscopy                 | Phenylbutazone PO        | University of Pennsylvania |
| 9     | Gelding  | Thoroughbred      | 8           | 485         | LH fetlock arthroscopy                 | Phenylbutazone PO        | University of Pennsylvania |
| 10    | Gelding  | Belgian Warmblood | 15          | 648         | R stifle arthroscopy                   | Phenylbutazone PO        | University of Pennsylvania |
| 11    | Stallion | Thoroughbred      | 2           | 486         | Osteosynthesis                         | Phenylbutazone PO        | University of Pennsylvania |
| 12    | Gelding  | Warmblood         | 8           | 603         | LF tenoscopy                           | Phenylbutazone PO        | University of Pennsylvania |
| 13    | Stallion | Thoroughbred      | 2           | 485         | LF fetlock arthroscopy                 | Phenylbutazone PO        | University of Pennsylvania |
| 14    | Gelding  | Warmblood         | 16          | 640         | L stifle arthroscopy                   | Phenylbutazone PO        | University of Pennsylvania |
| 15    | Gelding  | Thoroughbred      | 5           | 476         | L laryngoplasty & laser cordectomy     | Phenylbutazone PO        | University of Pennsylvania |
| 16    | Gelding  | Warmblood         | 9           | 662         | RH fasciotomy neurectomy               | Phenylbutazone PO        | University of Pennsylvania |
| 17    | Gelding  | Warmblood         | 1           | 444         | L hock arthroscopy                     | Phenylbutazone PO        | University of Pennsylvania |
| 18    | Gelding  | Thoroughbred      | 8           | 600         | Splint fracture bone removal           | Phenylbutazone PO        | University of Pennsylvania |
| 19    | Gelding  | Welsh Cross       | 17          | 480         | LF & RF MRI                            | None                     | University of Pennsylvania |
| 20    | Gelding  | Thoroughbred      | 23          | 456         | Phallectomy                            | Phenylbutazone PO        | University of Pennsylvania |
| 21    | Gelding  | Thoroughbred      | 4           | 589         | L stifle arthroscopy                   | Phenylbutazone PO        | University of Pennsylvania |

|    |          |                         |    |     |                                   |                                      |                            |
|----|----------|-------------------------|----|-----|-----------------------------------|--------------------------------------|----------------------------|
| 22 | Stallion | Thoroughbred            | 2  | 571 | LF pastern arthrodesis            | Phenylbutazone IV, epidural morphine | University of Pennsylvania |
| 23 | Gelding  | Thoroughbred            | 2  | 449 | L carpal arthroscopy              | Phenylbutazone PO                    | University of Pennsylvania |
| 24 | Mare     | Warmblood               | 17 | 580 | LF splint bone removal            | Phenylbutazone PO                    | University of Pennsylvania |
| 25 | Mare     | Thoroughbred            | 3  | 500 | LF tendon lavage                  | Phenylbutazone IV                    | University of Pennsylvania |
| 26 | Gelding  | Warmblood               | 25 | 555 | L hock arthroscopy                | Phenylbutazone PO                    | University of Pennsylvania |
| 27 | Mare     | Arabian                 | 17 | 421 | R elbow plate removal             | Phenylbutazone PO                    | University of Pennsylvania |
| 28 | Stallion | Standardbred            | 1  | 430 | MCIII screw placement             | Phenylbutazone PO                    | University of Pennsylvania |
| 29 | Mare     | Warmblood Cross         | 7  | 471 | R stifle nodulectomy              | Phenylbutazone PO                    | University of Pennsylvania |
| 30 | Mare     | Warmblood               | 8  | 462 | Superior check ligament desmotomy | Phenylbutazone PO                    | University of Pennsylvania |
| 31 | Gelding  | Warmblood               | 7  | 555 | LH tenoscopy                      | Phenylbutazone PO                    | University of Pennsylvania |
| 32 | Stallion | Thoroughbred            | 2  | 467 | L carpal arthroscopy              | Phenylbutazone PO                    | University of Pennsylvania |
| 33 | Gelding  | Arabian                 | 5  | 280 | LF fetlock arthroscopy            | Flunixin meglumine IV                | Unesp                      |
| 36 | Mare     | Mixed breed             | 7  | 303 | LF fetlock arthroscopy            | Flunixin meglumine IV                | Unesp                      |
| 37 | Stallion | Mixed breed             | 15 | 411 | Tooth extraction & sinuscopy      | Phenylbutazone PO                    | University of Ghent        |
| 38 | Gelding  | Royal Dutch Sport Horse | 5  | 546 | Hock arthroscopy                  | Phenylbutazone PO                    | University of Ghent        |
| 39 | Gelding  | N/A                     | 16 | 522 | Thyroidectomy                     | Phenylbutazone PO                    | University of Ghent        |
| 40 | Stallion | Warmblood               | 5  | 497 | Castration                        | Phenylbutazone PO                    | University of Ghent        |
| 41 | Mare     | Warmblood               | 6  | 540 | Sarcoid excisions                 | Phenylbutazone PO                    | University of Ghent        |
| 42 | Stallion | N/A                     | 24 | 370 | Enucleation                       | Phenylbutazone PO                    | University of Ghent        |
| 43 | Stallion | Mangalarga              | 7  | 415 | Castration                        | Flunixin meglumine IV                | Unesp                      |
| 44 | Stallion | Mangalarga              | 3  | 348 | Castration                        | Flunixin meglumine IV                | Unesp                      |

IV: intravenous; L: left; LF: left front; LH: left hind; N/A: information not available; R: right; MCIII: third metacarpal bone; RH: right hind; PO: oral.
