# Supplementary material for: A critical evaluation for validation of composite and unidimensional postoperative pain scales in horses
Source: PubMed Central journal article supplement (PMC8341545; doi:10.1371/journal.pone.0255618), 2021-08-05
Supplement: pone.0255618.s002.pdf [file pone.0255618.s002.pdf]

**S2 Table. Anesthetic and analgesic drug protocols**

| Horse | Premedication                                               | Induction              | Perianesthetic medication                                                      | Maintenance                 | Post-Surgery              | Remarks       | Period    |
|-------|-------------------------------------------------------------|------------------------|--------------------------------------------------------------------------------|-----------------------------|---------------------------|---------------|-----------|
| 1     | Acepromazine,<br>Detomidine,<br>Xylazine                    | EGG, Ketamine          | Phenylbutazone,<br>Xylazine                                                    | Isoflurane                  |                           |               | Morning   |
| 2     | Xylazine,<br>Butorfanol,<br>Detomidine                      | Midazolam,<br>Ketamine | Phenylbutazone,<br>Bupivacaine block,<br>Acepromazine                          | Isoflurane                  | Xylazine                  |               | Afternoon |
| 3     | Xylazine,<br>Midazolam,<br>Ketamine                         |                        | Phenylbutazone                                                                 | Isoflurane                  | Xylazine                  |               | Afternoon |
| 4     | XylazCTine                                                  | Midazolam,<br>Ketamine | Phenylbutazone,<br>Xylazine                                                    | Isoflurane                  |                           | Xylazine      | Morning   |
| 6     | Acepromazine,<br>Detomidine,<br>Butorphanol,<br>Xylazine    | Midazolam,<br>Ketamine | Dexmedetomidine,<br>Butorphanol                                                | Isoflurane                  |                           | Pool recovery | Morning   |
| 5     | Xylazine,<br>Acepromazine,<br>Detomidine,<br>Phenylbutazone | Midazolam,<br>Ketamine | Acepromazine                                                                   | Isoflurane, CRI<br>Xylazine | Telazolone                | Standing CT   | Afternoon |
| 7     |                                                             | Midazolam,<br>Ketamine | Phenylbutazone                                                                 | Isoflurane, CRI<br>Xylazine | Xylazine,<br>Acepromazine | Pool recovery | Afternoon |
| 8     | Acepromazine,<br>Detomidine,<br>Xylazine,<br>Phenylbutazone | Midazolam,<br>Ketamine | Detomidine,<br>Dexmedetomidine,<br>Local Block<br>Bupivacaine,<br>Acepromazine |                             | Telazolone                |               | Morning   |

|    |                                                                             |                        |                                                                     |                                      |                                          |                                                              |           |
|----|-----------------------------------------------------------------------------|------------------------|---------------------------------------------------------------------|--------------------------------------|------------------------------------------|--------------------------------------------------------------|-----------|
| 9  | Xylazine,<br>Phenylbutazone                                                 | Midazolam,<br>Ketamine | Butorphanol,<br>Acepromazine                                        |                                      | Detomidine,<br>Acepromazine              | Sedation with<br>Detomidine                                  | Morning   |
| 10 | Acepromazine,<br>Detomidine,<br>Xylazine,<br>Butorphanol,<br>Phenylbutazone | Midazolam,<br>Ketamine | Butorphanol                                                         | Isoflurane, CRI<br>Xylazine          |                                          | Flumazenil                                                   | Afternoon |
| 11 | Acepromazine,<br>Detomidine,<br>Xylazine,<br>Phenylbutazone                 | Midazolam,<br>Ketamine | Detomidine,<br>Xylazine                                             | Isoflurane                           |                                          | Xylazine                                                     | Afternoon |
| 12 | Acepromazine,<br>Detomidine,<br>Xylazine                                    | Midazolam,<br>Ketamine | Butorphanol,<br>Phenylbutazone,<br>Bupivacaine<br>(Block), Xylazine | Isoflurane, CRI<br>Xylazine          | Xylazine                                 | Sedation with<br>Detomidine                                  | Morning   |
| 13 | Acepromazine,<br>Detomidine,<br>Xylazine,<br>Phenylbutazone                 | Midazolam,<br>Ketamine | Dexmedetomidine,<br>Acepromazine                                    | Isoflurane                           |                                          | Pre-surgery<br>Phenylbutazone<br>PO                          | Morning   |
| 14 | Acepromazine,<br>Detomidine,<br>Xylazine                                    | ECG, Ketamine          | Butorphanol,<br>Ketamine,<br>Xylazine                               | Isoflurane, CRI<br>Xylazine          | Xylazine,<br>Acepromazine,<br>Tolazoline | Increased<br>creatinine,<br>Phenylbutazone<br>PO Pre-surgery | Morning   |
| 15 | Acepromazine,<br>Detomidine,<br>Xylazine                                    | Midazolam,<br>Ketamine | Phenylbutazone,<br>Dexametasona,<br>Butorphanol,<br>Detomidine      | Isoflurane                           | Xylazine                                 | Dexamethasone                                                | Morning   |
| 16 | Xylazine,<br>Phenylbutazone                                                 | Midazolam,<br>Ketamine | Butorphanol,<br>Acepromazine                                        | Isoflurane,<br>Bupivacaine<br>Splash | Xylazine                                 |                                                              | Morning   |

|    |                                              |                        |                                                                                                   |                                  |                                        |                                                                                                                               |           |
|----|----------------------------------------------|------------------------|---------------------------------------------------------------------------------------------------|----------------------------------|----------------------------------------|-------------------------------------------------------------------------------------------------------------------------------|-----------|
| 17 | Acepromazine,<br>Detomidine,<br>Xylazine     | Midazolam,<br>Ketamine | Xylazine,<br>Phenylbutazone                                                                       | Isoflurane                       |                                        |                                                                                                                               | Morning   |
| 18 | Acepromazine,<br>Detomidine,<br>Xylazine     | Midazolam,<br>Ketamine | Butorphanol,<br>Xylazine,<br>Acepromazine,<br>Detomidine                                          | Isoflurane                       |                                        | Phenylbutazone<br>PO pre-surgery                                                                                              | Morning   |
| 19 | Xylazine                                     | Midazolam,<br>Ketamine | Phenylbutazone,<br>Acepromazine                                                                   | Isoflurane                       | Xylazine                               | Sedation with<br>xylazine                                                                                                     | Morning   |
| 20 | Xylazine,<br>Butorphanol,<br>Xylazine        | Midazolam,<br>Ketamine | Ketamine,<br>Acepromazine,<br>Lido                                                                | Desflurane, CRI<br>Lidocaine     | Xylazine                               | Phenylbutazone<br>PO                                                                                                          | Morning   |
| 21 | Acepromazine,<br>Detomidine,<br>Xylazine     | Midazolam,<br>Ketamine | Phenylbutazone,<br>Xylazine,<br>Intraarticular<br>Bupivacaine,<br>Butorphanol,<br>Dexmedetomidine |                                  |                                        | Xylazine,<br>Detomidine,<br>Phenylbutazone<br>(PO). Rescue<br>analgesia with<br>morphine/xylazine<br>via epidural<br>Catheter | Morning   |
| 22 | Acepromazine,<br>Xylazine,<br>Phenylbutazone | Midazolam,<br>Ketamine | Dexmedetomidine,                                                                                  | Desflurane, Local<br>Bupivacaine | Flumazenil,<br>Tolazoline,<br>Xylazine |                                                                                                                               | Morning   |
| 23 | Xylazine                                     | Midazolam,<br>Ketamine | Phenylbutazone,<br>Butorphanol<br>Bolus,<br>Acepromazine                                          | Isoflurane                       | Xylazine                               |                                                                                                                               | Morning   |
| 24 | Phenylbutazone,<br>Acepromazine,<br>Xylazine | Midazolam,<br>Ketamine | Butorphanol                                                                                       | Isoflurane                       | Xylazine                               |                                                                                                                               | Afternoon |

|    |                                                              |                                     |                                      |                                                  |                                     |                                                                                               |           |
|----|--------------------------------------------------------------|-------------------------------------|--------------------------------------|--------------------------------------------------|-------------------------------------|-----------------------------------------------------------------------------------------------|-----------|
| 25 | Xylazine                                                     | Midazolam,<br>Ketamine              | Butorphanol,<br>Xylazine             | Desflurane,<br>Dexmedetomidine                   | Flumazenil                          | Patient lying on<br>M3, Continuous<br>rate infusion of<br>Gabapentin,<br>Phenylbutazone<br>IV | Afternoon |
| 26 | Acepromazine,<br>Detomidine,<br>Phenylbutazone               | Xylazine, Ketamine,<br>Midazolam    | Butorphanol,<br>Acepromazine         | Isoflurane, CRI<br>Xylazine                      |                                     |                                                                                               | Morning   |
| 27 | Acepromazine,<br>Xylazine,<br>Butorphanol,<br>Phenylbutazone | Midazolam,<br>Ketamine              | Butorphanol,<br>Dexmedetomidine      | Isoflurane                                       | Flumazenil                          |                                                                                               | Morning   |
| 28 | Acepromazine,<br>Detomidine,<br>Phenylbutazone               | Xylazine,<br>Midazolam,<br>Ketamine | Butorphanol                          | CRI Xylazine,<br>Isoflurane                      |                                     |                                                                                               | Morning   |
| 29 | Xylazine                                                     | Midazolam,<br>Ketamine              | Phenylbutazone,<br>Butorphanol Bolus | Isoflurane                                       | Acepromazine,<br>Xylazine           |                                                                                               | Morning   |
| 30 | Xylazine,<br>Butorphanol                                     | Midazolam,<br>Ketamine              | Phenylbutazone,<br>Butorphanol Bolus | Isoflurane                                       | Acepromazine,<br>Telazolone         | Detomidine 5h<br>before M0                                                                    | Morning   |
| 31 | Acepromazine,<br>Detomidine                                  | Ketamine, Xylazine                  | Phenylbutazone,<br>Butorphanol Bolus | Isoflurane                                       | Romifidine                          | MRI                                                                                           | Morning   |
| 32 | Xylazine                                                     | Midazolam,<br>Ketamine              | Phenylbutazone                       | Isoflurane                                       | Xylazine,<br>Acepromazine           | M0 6h before<br>procedure                                                                     | Morning   |
| 33 | Acepromazine,<br>Xylazine                                    | Diazepam,<br>Ketamine               |                                      | Isoflurane, CRI<br>Lidocaine, Block<br>Lidocaine | Flunixin<br>meoglumine              |                                                                                               | Afternoon |
| 36 | Acepromazine,<br>Xylazine                                    | Diazepam,<br>Ketamine               |                                      | Isoflurane, CRI<br>Lidocaine, Block<br>Lidocaine | Xylazine,<br>Flunixin<br>meoglumine |                                                                                               | Afternoon |

|    |                           |                       |  |                                                      |                                     |                             |         |
|----|---------------------------|-----------------------|--|------------------------------------------------------|-------------------------------------|-----------------------------|---------|
| 37 | Detomidine                |                       |  | CRI Detomidine,<br>Mepivacaina<br>Local              |                                     |                             | Morning |
| 38 | Morphine,<br>Romifidine   | Diazepam,<br>Ketamine |  | CRI Romifidine,<br>Isoflurane/Flurane                |                                     |                             | Morning |
| 39 | Morphine,<br>Romifidine   |                       |  | CRI Romifidine                                       |                                     |                             | Morning |
| 40 | Morphine,<br>Romifidine   |                       |  | CRI Romifidine                                       |                                     |                             | Morning |
| 41 | Morphine,<br>Romifidine   |                       |  | CRI Romifidine                                       |                                     |                             | Morning |
| 42 | Detomidine,<br>Morphine   |                       |  | CRI Romifidine,<br>Local<br>Mepivacaine              |                                     |                             | Morning |
| 43 | Acepromazine,<br>Xylazine | Diazepam,<br>Ketamine |  | Isoflurane,<br>Lidocaine<br>Intratesticular<br>Block | Ketamine,<br>Flunixin<br>meoglumine |                             | Morning |
| 44 | Acepromazine,<br>Xylazine | Ketamine,<br>Diazepam |  | Isoflurane,<br>Intratesticular<br>Lidocaine          | Flunixin<br>meoglumine              | Developed colic<br>after M3 | Morning |

CRI – constant rate infusion; CT – computed tomography; IV – intravenous; MRI – magnetic resonance image; PO – oral.
