# Supplementary material for: A critical evaluation for validation of composite and unidimensional postoperative pain scales in horses
Source: PubMed Central journal article supplement (PMC8341545; doi:10.1371/journal.pone.0255618), 2021-08-05
Supplement: pone.0255618.s003.pdf [file pone.0255618.s003.pdf]

**S3 Table. Repeatability of the UHAPS, CPS and unidimensional scales to assess perioperative pain in horses**

|                                            | Intra-observer reliability [(kappa* or intraclass correlation** coefficients (confidence interval 95%)] |                         |                         |                         |                         |                         |
|--------------------------------------------|---------------------------------------------------------------------------------------------------------|-------------------------|-------------------------|-------------------------|-------------------------|-------------------------|
|                                            | Reference Evaluator                                                                                     | Lead Investigator       | Anesthesiologist        | Veterinary Technician   | Equine internist        | Veterinary Student      |
| <b>UHAPS</b>                               |                                                                                                         |                         |                         |                         |                         |                         |
| Positioning in the stall*                  | 0.93 (0.87-0.98)                                                                                        | 0.91 (0.86-0.95)        | 0.73 (0.61-0.85)        | 0.78 (0.67-0.88)        | 0.65 (0.53-0.76)        | 0.73 (0.63-0.84)        |
| Locomotion*                                | 0.90 (0.84-0.97)                                                                                        | 0.90 (0.84-0.97)        | 0.80 (0.67-0.93)        | 0.58 (0.46-0.70)        | 0.53 (0.38-0.68)        | 0.50 (0.25-0.74)        |
| Locomotion when led by the evaluator*      | 0.92 (0.86-0.98)                                                                                        | 0.92 (0.86-0.98)        | 0.77 (0.61-0.93)        | 0.67 (0.54-0.79)        | 0.69 (0.59-0.79)        | 0.73 (0.62-0.85)        |
| Response to palpation of the painful area* | 0.91 (0.84-0.98)                                                                                        | 0.88 (0.82-0.94)        | 0.68 (0.51-0.84)        | 0.69 (0.60-0.79)        | 0.82 (0.74-0.90)        | 0.80 (0.70-0.89)        |
| Looking at the flank*                      | 0.96 (0.88-1.00)                                                                                        | 0.66 (0.04-1.00)        | 0.49 (-0.11-1.00)       | 0.66 (0.05-1.00)        | 0.42 (0.09-0.76)        | 0.66 (0.05-1.00)        |
| Kicking at the abdomen*                    | 1.00 (1.00-1.00)                                                                                        | 1.00 (1.00-1.00)        | 0.66 (0.05-1.00)        | 0.28 (0.56-0.80)        | 0.58 (0.34-0.83)        | 0.80 (0.41-1.00)        |
| Lifting hind limbs*                        | 0.89 (1.00-1.00)                                                                                        | 0.80 (0.65-0.94)        | 0.78 (0.63-0.94)        | 0.32 (0.15-0.49)        | 0.56 (0.41-0.70)        | 0.49 (0.23-0.75)        |
| Head movements*                            | 0.89 (0.78-1.00)                                                                                        | 0.87 (0.76-0.99)        | 0.80 (0.65-0.95)        | 0.50 (0.30-0.70)        | 0.53 (0.39-0.67)        | 0.67 (0.40-0.95)        |
| Pawing on the floor*                       | 0.77 (0.54-0.99)                                                                                        | 0.57 (0.28-0.85)        | 0.33 (0.16-0.81)        | 0.60 (0.28-0.92)        | 0.64 (0.41-0.87)        | 0.76 (0.50-1.00)        |
| <b>UHAPS total score**</b>                 | <b>0.96 (0.94-0.97)</b>                                                                                 | <b>0.95 (0.93-0.96)</b> | <b>0.82 (0.76-0.87)</b> | <b>0.80 (0.73-0.85)</b> | <b>0.77 (0.70-0.83)</b> | <b>0.79 (0.73-0.84)</b> |
| <b>CPS</b>                                 |                                                                                                         |                         |                         |                         |                         |                         |
| Appearance*                                | 0.85 (0.76-0.94)                                                                                        | 0.91 (0.84-0.97)        | 0.66 (0.43-0.90)        | 0.64 (0.54-0.75)        | 0.62 (0.51-0.74)        | 0.63 (0.52-0.75)        |
| Kicking at abdomen*                        | 0.66 (0.16-1.00)                                                                                        | 1.00 (1.00-1.00)        | 0.50 (-0.1-1.00)        | 0.28 (-0.23-0.80)       | 0.63 (0.34-0.93)        | 0.80 (0.40-1.00)        |
| Pawing on the floor*                       | 1.00 (1.00-1.00)                                                                                        | 0.96 (0.91-1.00)        | 0.08 (-0.13-0.31)       | 0.46 (0.22-0.71)        | 0.64 (0.48-0.80)        | 0.73 (0.55-0.90)        |
| Posture*                                   | 0.91 (0.85-0.97)                                                                                        | 0.91 (0.84-0.97)        | 0.83 (0.71-0.94)        | 0.73 (0.63-0.82)        | 0.74 (0.62-0.85)        | 0.79 (0.70-0.88)        |
| Head movement*                             | 0.91 (0.83-0.99)                                                                                        | 0.77 (0.66-0.88)        | 0.72 (0.50-0.94)        | 0.57 (0.35-0.79)        | 0.54 (0.36-0.85)        | 0.81 (0.61-1.00)        |
| Appetite*                                  | 0.91 (0.86-0.97)                                                                                        | 0.92 (0.87-0.97)        | 0.79 (0.70-0.89)        | 0.74 (0.64-0.83)        | 0.73 (0.63-0.83)        | 0.82 (0.74-0.89)        |
| Response to observer*                      | 0.97 (0.90-1.00)                                                                                        | 0.55 (0.16-0.93)        | 0.66 (0.17-1.00)        | 0.71 (0.19-1.00)        | 0.66 (0.51-0.82)        | 0.93 (0.78-1.00)        |
| Response to palpation of the painful area* | 0.86 (0.79-0.93)                                                                                        | 0.86 (0.79-0.93)        | 0.70 (0.56-0.84)        | 0.71 (0.61-0.82)        | 0.83 (0.77-0.89)        | 0.84 (0.78-0.90)        |
| <b>CPS total score**</b>                   | <b>0.95 (0.93-0.96)</b>                                                                                 | <b>0.94 (0.91-0.95)</b> | <b>0.83 (0.77-0.87)</b> | <b>0.85 (0.80-0.89)</b> | <b>0.80 (0.74-0.85)</b> | <b>0.83 (0.78-0.87)</b> |

|                                        |                  |                  |                  |                  |                  |                  |
|----------------------------------------|------------------|------------------|------------------|------------------|------------------|------------------|
| <b>Indication of rescue analgesia*</b> | 0.92 (0.84-1.00) | 0.90 (0.81-0.98) | 0.74 (0.55-0.92) | 0.66 (0.52-0.81) | 0.67 (0.55-0.78) | 0.58 (0.44-0.72) |
| <b>Simple descriptive scale*</b>       | 0.95 (0.93-0.98) | 0.94 (0.92-0.97) | 0.87 (0.81-0.92) | 0.83 (0.76-0.89) | 0.84 (0.79-0.90) | 0.72 (0.59-0.86) |
| <b>Simple numeric scale*</b>           | 0.98 (0.97-0.99) | 0.98 (0.97-0.99) | 0.94 (0.91-0.96) | 0.82 (0.72-0.93) | 0.87 (0.82-0.93) | 0.70 (0.58-0.83) |
| <b>Visual analog scale**</b>           | 0.98 (0.97-0.99) | 0.98 (0.97-0.98) | 0.94 (0.92-0.96) | 0.86 (0.82-0.90) | 0.88 (0.83-0.91) | 0.75 (0.67-0.81) |

UHAPS- Unesp-Botucatu horse acute pain scale; CPS - Composite Pain Scale. Interpretation of Kappa coefficient results; kw 0.81-1.0 very good; 0.61-0.80 good; 0.41-0.60 moderate; 0.21-0.4 reasonable; < 0.2 poor [37,38] . \* Intraclass correlation coefficient (confidence interval of 95%).
