# Supplementary material for: A critical evaluation for validation of composite and unidimensional postoperative pain scales in horses
Source: PubMed Central journal article supplement (PMC8341545; doi:10.1371/journal.pone.0255618), 2021-08-05
Supplement: pone.0255618.s004.pdf [file pone.0255618.s004.pdf]

**S4 Table. Reproducibility of the UHAPS, CPS and unidimensional scales to assess perioperative pain in horses.**

| Inter-observer reliability [(kappa* or intraclass correlation** coefficients (confidence interval 95%)] |                         |                         |                         |                         |                         |
|---------------------------------------------------------------------------------------------------------|-------------------------|-------------------------|-------------------------|-------------------------|-------------------------|
| Reference evaluator <i>versus</i>                                                                       |                         |                         |                         |                         |                         |
| UHAPS                                                                                                   | Lead investigator       | Anesthesiologist        | Veterinary technician   | Equine internist        | Veterinary student      |
| Positioning in the stall*                                                                               | 0.54 (0.41-0.68)        | 0.53 (0.40-0.67)        | 0.65 (0.55-0.75)        | 0.41 (0.27-0.55)        | 0.60 (0.48-0.72)        |
| Locomotion*                                                                                             | 0.90 (0.84-0.97)        | 0.38 (0.24-0.51)        | 0.34 (0.23-0.45)        | 0.28 (0.18-0.38)        | 0.06 (-0.03-0.14)       |
| Locomotion when led by the evaluator*                                                                   | 0.92 (0.86-0.98)        | 0.59 (0.46-0.72)        | 0.50 (0.37-0.64)        | 0.46 (0.33-0.59)        | 0.57 (0.44-0.70)        |
| Response to palpation of the painful area*                                                              | 0.52 (0.40-0.64)        | 0.68 (0.58-0.78)        | 0.56 (0.43-0.69)        | 0.38 (0.25-0.52)        | 0.58 (0.46-0.69)        |
| Looking at the flank*                                                                                   | 0.25 (-0.03-0.53)       | 0.54 (0.26-0.81)        | 0.13 (-0.10-0.37)       | 0.25 (-0.03-0.53)       | 0.13 (-0.10-0.37)       |
| Kicking at the abdomen*                                                                                 | -0.01 (-0.02-0)         | 0.35 (-0.01 – 0.71)     | -0.01 (-0.02-0.00)      | 0.66 (0.05-1.00)        | 0.39 (-0.16-0.94)       |
| Lifting hind limbs*                                                                                     | 0.89 (0.79-1.00)        | 0.37 (0.20 -0.54)       | 0.27 (0.08-0.47)        | 0.47 (0.27-0.68)        | 0.41 (0.19-0.63)        |
| Head movements*                                                                                         | 0.87 (0.76-0.99)        | 0.35 (0.17 – 0.52)      | 0.15 (0.-0.31)          | 0.27 (0.12-0.42)        | 0.27 (0.12-0.43)        |
| Pawing on the floor*                                                                                    | 0.77 (0.54-0.99)        | 0.34 (0.07-0.61)        | 0.47 (0.16-0.79)        | 0.21 (-0.14-0.57)       | 0.65 (0.37-0.94)        |
| <b>Total score UHAPS**</b>                                                                              | <b>0.83 (0.78-0.87)</b> | <b>0.73 (0.65-0.79)</b> | <b>0.63 (0.53-0.71)</b> | <b>0.40 (0.26-0.52)</b> | <b>0.49 (0.36-0.59)</b> |
| <b>CPS</b>                                                                                              |                         |                         |                         |                         |                         |
| Appearance*                                                                                             | 0.66 (0.55-0.77)        | 0.27 (0.16-0.39)        | 0.43 (0.29-0.57)        | 0.13 (0.01-0.26)        | 0.00 (-0.12-0.13)       |
| Kicking at the abdomen*                                                                                 | 0.22 (-0.18- 0.61)      | 0.17 (-0.04-0.39)       | 0.22 (-0.18-0.61)       | 0.22 (-0.18-0.61)       | 0.35 (-0.08-0.78)       |
| Pawing on the floor*                                                                                    | 0.94 (0.90-0.98)        | 0.51 (0.20-0.82)        | 0.39 (0.12-0.65)        | 0.02 (-0.6-0.10)        | 0.52 (0.21-0.83)        |

|                                            |                         |                         |                         |                         |                         |
|--------------------------------------------|-------------------------|-------------------------|-------------------------|-------------------------|-------------------------|
| Posture*                                   | 1.00 (1.00-1.00)        | 0.62 (0.48-0.76)        | 0.55 (0.55-0.76)        | 0.60 (0.48-0.72)        | 0.46 (0.29-0.62)        |
| Head movement*                             | 0.91 (0.84-0.98)        | 0.50 (0.32-0.68)        | 0.29 (0.10-0.48)        | 0.25 (0.11-0.39)        | 0.35 (0.15-0.55)        |
| Appetite*                                  | 1.00 (1.00-1.00)        | 0.66 (0.55 – 0.76)      | 0.62 (0.51-0.72)        | 0.49 (0.36-0.61)        | 0.49 (0.39-0.58)        |
| Response to observer*                      | 0.07 (-12-0.26)         | 0.10 (-0.05 -0.25)      | 0.47 (-0.02-0.95)       | 0.39 (-0.13-0.92)       | 0.40 (-0.06-0.85)       |
| Response to palpation of the painful area* | 1.00 (1.00-1.00)        | 0.70 (0.61 – 0.79)      | 0.49 (0.34-0.64)        | 0.40 (0.25-0.55)        | 0.57 (0.46-0.67)        |
| <b>Total score CPS**</b>                   | <b>0.96 (0.94-0.97)</b> | <b>0.63 (0.53-0.71)</b> | <b>0.70 (0.62-0.77)</b> | <b>0.33 (0.19-0.46)</b> | <b>0.43 (0.30-0.55)</b> |
| Rescue*                                    | 0.78 (0.66-0.89)        | 0.23 (0.14-0.32)        | 0.47 (0.28-0.65)        | 0.59 (0.41-0.77)        | 0.53 (0.37-0.68)        |
| Simple descriptive scale*                  | 0.93 (0.91-0.96)        | 0.77 (0.68-0.87)        | 0.59 (0.49-0.69)        | 0.76 (0.69-0.82)        | 0.37 (0.25-0.49)        |
| Simple numeric scale*                      | 0.98 (0.97-0.99)        | 0.82 (0.73-0.90)        | 0.66 (0.54-0.77)        | 0.84 (0.78-0.89)        | 0.33 (0.22-0.45)        |
| Visual analog scale**                      | 0.98 (0.97-0.98)        | 0.83 (0.77-0.87)        | 0.64 (0.54-0.72)        | 0.79 (0.72-0.84)        | 0.22 (0.07-0.36)        |

UHAPS: Unesp-Botucatu horse acute pain scale; CPS: Composite Orthopedic Pain Scale. Reference evaluator was the one with the highest intra-observer reliability.
