# Supplementary material for: A critical evaluation for validation of composite and unidimensional postoperative pain scales in horses
Source: PubMed Central journal article supplement (PMC8341545; doi:10.1371/journal.pone.0255618), 2021-08-05
Supplement: pone.0255618.s005.pdf [file pone.0255618.s005.pdf]

**S5 Table 5. Median (range) scores of the UHAPS, CPS and unidimensional scales in the perioperative period in horses.**

|                                      | <b>M0</b>               | <b>M1</b>                 | <b>M2</b>                 | <b>M3</b>                |
|--------------------------------------|-------------------------|---------------------------|---------------------------|--------------------------|
| <b>UHAPS</b>                         |                         |                           |                           |                          |
| Reference evaluator                  | 1 <sup>b</sup> (0 – 8)  | 3 <sup>a</sup> (0 – 8)    | 3 <sup>a</sup> (0 – 9)    | 3 <sup>ab</sup> (0 – 8)  |
| Lead investigator                    | 2 <sup>b</sup> (0 – 6)  | 4 <sup>a</sup> (0 – 8)    | 3.5 <sup>a</sup> (0 – 9)  | 3 <sup>ab</sup> (0 – 10) |
| Equine internist                     | 0 <sup>b</sup> (0 – 6)  | 1.5 <sup>a</sup> (0 – 7)  | 2 <sup>a</sup> (0 – 7)    | 1 <sup>ab</sup> (0 – 7)  |
| Anesthesiologist                     | 1 <sup>b</sup> (0 – 7)  | 2 <sup>a</sup> (0 – 10)   | 2 <sup>ab</sup> (0 – 7)   | 2 <sup>ab</sup> (0 – 10) |
| Veterinary student                   | 1 <sup>b</sup> (0 – 6)  | 2 <sup>a</sup> (0 – 5)    | 1.5 <sup>ab</sup> (0 – 5) | 2 <sup>ab</sup> (0 – 7)  |
| Veterinary technician                | 1 <sup>b</sup> (0 – 7)  | 3 <sup>a</sup> (0 – 11)   | 3 <sup>a</sup> (0 – 8)    | 3 <sup>ab</sup> (0 – 9)  |
| <b>CPS</b>                           |                         |                           |                           |                          |
| Reference evaluator                  | 3 <sup>b</sup> (0 – 10) | 5 <sup>ab</sup> (0 – 15)  | 5.5 <sup>a</sup> (0 – 18) | 4 <sup>ab</sup> (0 – 17) |
| Lead investigator                    | 3 <sup>b</sup> (0 – 11) | 5 <sup>ab</sup> (0 – 13)  | 5.5 <sup>a</sup> (0 – 17) | 4 <sup>ab</sup> (0 – 14) |
| Equine internist                     | 2 (0 – 8)               | 3 (0 – 9)                 | 3 (0 – 13)                | 3 (0 – 13)               |
| Anesthesiologist                     | 2 <sup>b</sup> (0 – 11) | 3,5 <sup>a</sup> (0 – 11) | 4 <sup>ab</sup> (0 – 16)  | 4 <sup>ab</sup> (0 – 14) |
| Veterinary student                   | 3 (0 – 7)               | 4 (0 – 9)                 | 3 (0 – 13)                | 4 (0 – 12)               |
| Veterinary technician                | 4 <sup>b</sup> (0 – 14) | 7 <sup>a</sup> (1 – 16)   | 7 <sup>ab</sup> (0 – 17)  | 6 <sup>ab</sup> (0 – 18) |
| <b>Rescue indication<sup>1</sup></b> |                         |                           |                           |                          |
| Reference evaluator                  | 0 (0 – 1)               | 1 (0 – 1)                 | 1 (0 – 1)                 | 1 (0 – 1)                |
| Lead investigator                    | 0 (0 – 1)               | 1 (0 – 1)                 | 1 (0 – 1)                 | 1 (0 – 1)                |
| Equine internist                     | 0 (0 – 1)               | 1 (0 – 1)                 | 1 (0 – 1)                 | 1 (0 – 1)                |
| Anesthesiologist                     | 0 (0 – 1)               | 1 (0 – 1)                 | 1 (0 – 1)                 | 1 (0 – 1)                |
| Veterinary student                   | 0 (0 – 1)               | 1 (0 – 1)                 | 1 (0 – 1)                 | 1 (0 – 1)                |
| Veterinary technician                | 0 <sup>b</sup> (0 – 1)  | 1 <sup>a</sup> (0 – 1)    | 1 <sup>a</sup> (0 – 1)    | 1 <sup>ab</sup> (0 – 1)  |
| <b>Simple descriptive</b>            |                         |                           |                           |                          |
| Reference evaluator                  | 0 <sup>b</sup> (0 – 4)  | 1 <sup>a</sup> (0 – 4)    | 1 <sup>a</sup> (0 – 5)    | 1 <sup>ab</sup> (0 – 5)  |
| Lead investigator                    | 0 <sup>b</sup> (0 – 4)  | 1 <sup>a</sup> (0 – 4)    | 1 <sup>a</sup> (0 – 4)    | 1 <sup>ab</sup> (0 – 4)  |

|                            |                            |                               |                               |                             |
|----------------------------|----------------------------|-------------------------------|-------------------------------|-----------------------------|
| Equine internist           | 0 <sup>b</sup> (0 – 4)     | 1 <sup>a</sup> (0 – 3)        | 1 <sup>a</sup> (0 – 4)        | 1 <sup>ab</sup> (0 – 4)     |
| Anesthesiologist           | 0.5 <sup>b</sup> (0 – 3)   | 1 <sup>a</sup> (0 – 3)        | 1 <sup>a</sup> (0 – 3)        | 1 <sup>ab</sup> (0 – 5)     |
| Veterinary student         | 0 (0 – 1)                  | 0 (0 – 2)                     | 0 (0 – 2)                     | 0 (0 – 6)                   |
| Veterinary technician      | 0 <sup>b</sup> (0 – 4)     | 1 <sup>a</sup> (0 – 4)        | 1 <sup>a</sup> (0 – 5)        | 1 <sup>ab</sup> (0 – 4)     |
| <b>Simple numeric</b>      |                            |                               |                               |                             |
| Reference evaluator        | 0 <sup>b</sup> (0 – 8)     | 2.5 <sup>a</sup> (0 – 9)      | 2 <sup>a</sup> (0 – 9)        | 1 <sup>ab</sup> (0 – 10)    |
| Lead investigator          | 0 <sup>b</sup> (0 – 8)     | 2 <sup>a</sup> (0 – 9)        | 2 <sup>a</sup> (0 – 9)        | 1 <sup>ab</sup> (0 – 9)     |
| Equine internist           | 0 <sup>b</sup> (0 – 8)     | 2 <sup>a</sup> (0 – 8)        | 1 <sup>a</sup> (0 – 9)        | 1 <sup>b</sup> (0 – 9)      |
| Anesthesiologist           | 0.5 <sup>b</sup> (0 – 6)   | 2 <sup>a</sup> (0 – 6)        | 2 <sup>ab</sup> (0 – 7)       | 2 <sup>ab</sup> (0 – 10)    |
| Veterinary student         | 0.5 (0 – 3)                | 1 (0 – 3)                     | 0 (0 – 3)                     | 1 (0 – 10)                  |
| Veterinary technician      | 0 <sup>b</sup> (0 – 8)     | 2.5 <sup>a</sup> (0 – 9)      | 2.5 <sup>a</sup> (0 – 10)     | 2 <sup>ab</sup> (0 – 9)     |
| <b>Visual analog scale</b> |                            |                               |                               |                             |
| Reference evaluator        | 0 <sup>b</sup> (0 – 8.8)   | 2.7 <sup>a</sup> (0 – 10)     | 2.1 <sup>a</sup> (0 – 10)     | 1.1 <sup>a</sup> (0 -10)    |
| Lead investigator          | 0 <sup>b</sup> (0 - 8.5)   | 2.3 <sup>a</sup> (0 - 9.2)    | 2 <sup>a</sup> (0 – 9)        | 1.1 <sup>ab</sup> (0 - 9.6) |
| Equine internist           | 0 <sup>b</sup> (0 - 7.8)   | 1.5 <sup>a</sup> (0 - 7.6)    | 1 <sup>a</sup> (0 - 8.8)      | 1 <sup>ab</sup> (0 - 9.4)   |
| Anesthesiologist           | 0.6 <sup>b</sup> (0 - 5.8) | 1.8 <sup>a</sup> (0 – 6)      | 1.9 <sup>a</sup> (0 - 6.1)    | 1.6 <sup>ab</sup> (0 – 10)  |
| Veterinary student         | 0.5 (0 – 3)                | 1 (0 – 3)                     | 0 (0 – 3)                     | 1 (0 – 10)                  |
| Veterinary technician      | 0.5 <sup>b</sup> (0 – 8)   | 2.25 <sup>a</sup> (0.2 - 8.5) | 1.95 <sup>a</sup> (0.2 - 9.1) | 1.35 <sup>a</sup> (0 - 9.3) |

UHAPS: Unesp-Botucatu horse acute pain scale; CPS: Composite Orthopedic Pain Scale. Total scores were compared over time (M0 vs M1 vs M2 vs M3) by Friedman test, with p-value corrected by Bonferroni. Different letters express differences over time (a>b). <sup>1</sup> For the dichotomic item 'rescue indication' (0 = no indication of rescue analgesia; 1 = indication of rescue analgesia), the logistical regression using the Tukey test as a *post-hoc* test was applied. Results were the same for all evaluators; however, differences were significant only for Veterinary technician. M0 – before surgery; M1 – up to 4 hours after surgery; M2 - up to 3 hours after analgesic treatment; M3 - 24 hours after surgery.
